# Supplementary material for: Understanding Variation in Transcription Factor Binding by Modeling Transcription Factor Genome-Epigenome Interactions
Source: PubMed Central journal article supplement (PMC3854512; doi:10.1371/journal.pcbi.1003367), 2013-12-05
Supplement: pcbi.1003367.s009.pdf [file pcbi.1003367.s009.pdf]

**A**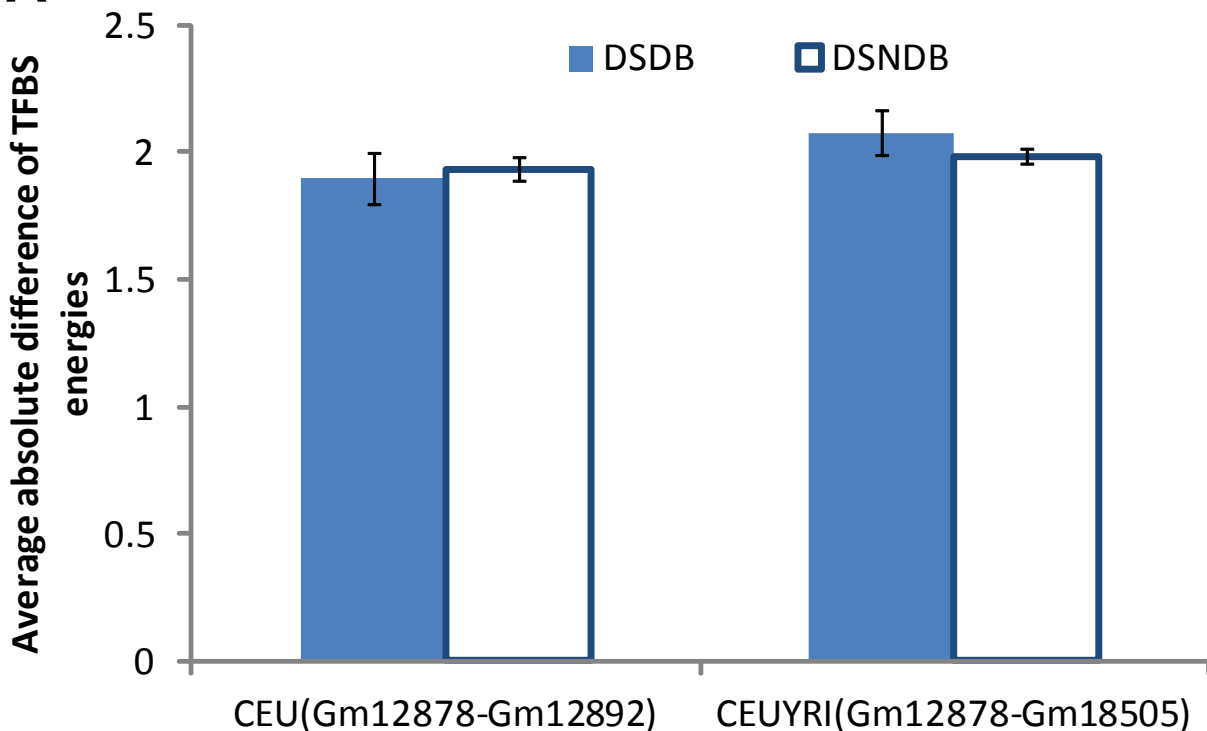**B****CEU(Gm12878-Gm12892)**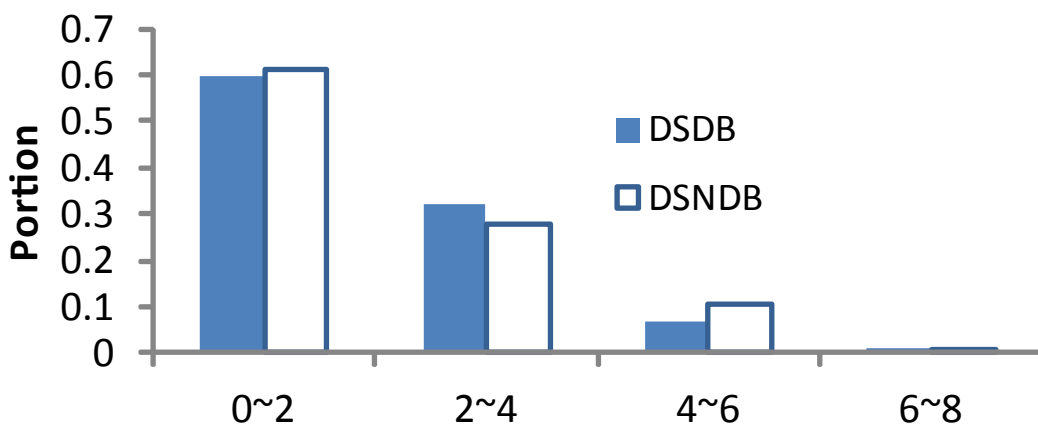**C****CEUYRI (Gm12878-Gm18505)**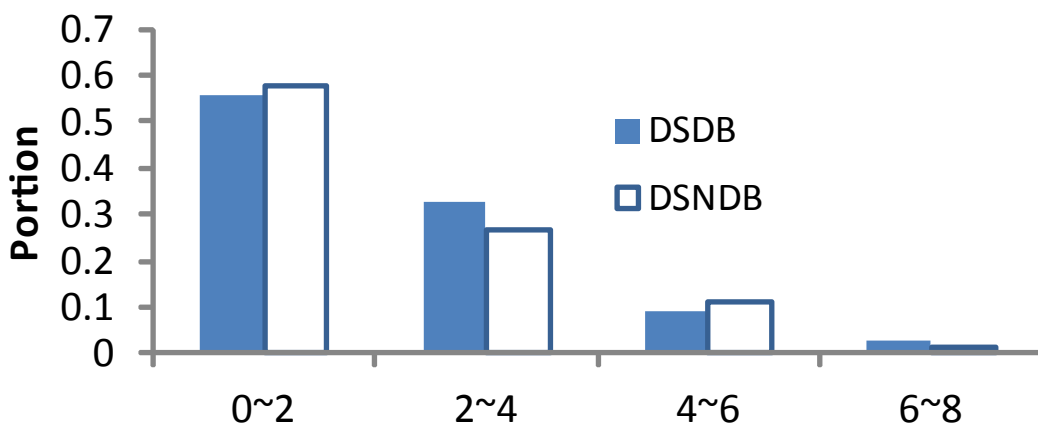

Distribution of average absolute differences of TFBS energies
