# Supplementary material for: Understanding Variation in Transcription Factor Binding by Modeling Transcription Factor Genome-Epigenome Interactions
Source: PubMed Central journal article supplement (PMC3854512; doi:10.1371/journal.pcbi.1003367), 2013-12-05

### A. CEU(Gm12878-Gm12892)

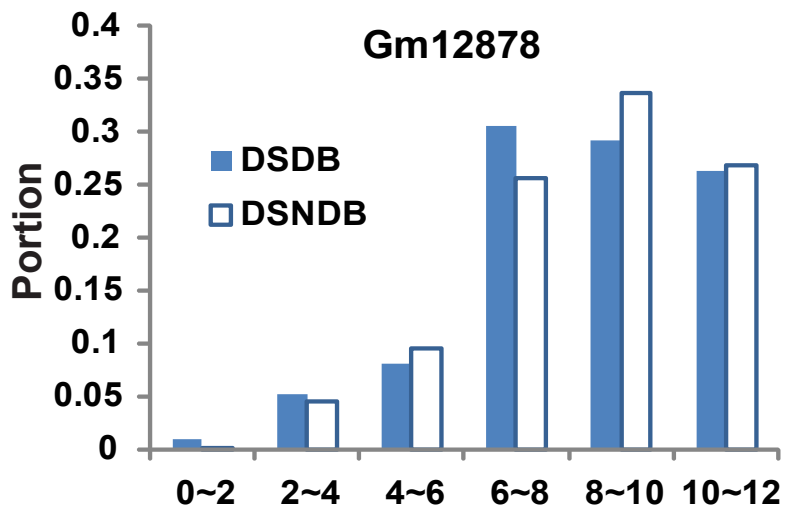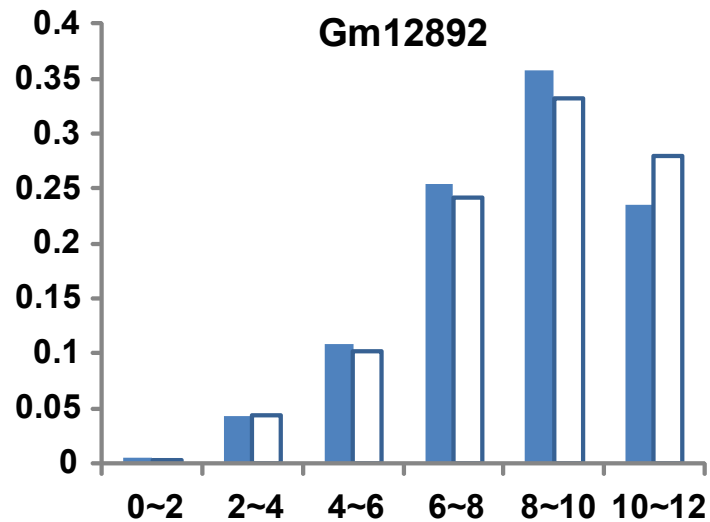

### B. CEUYRI(Gm12878-Gm18505)

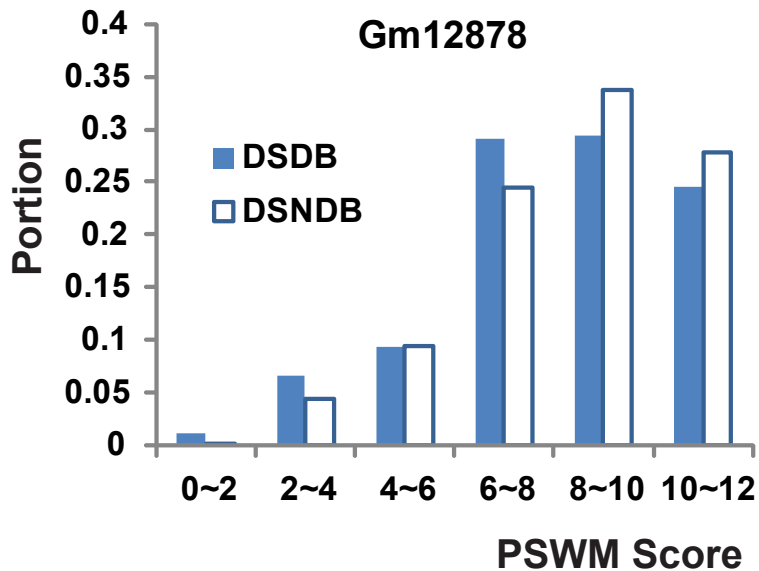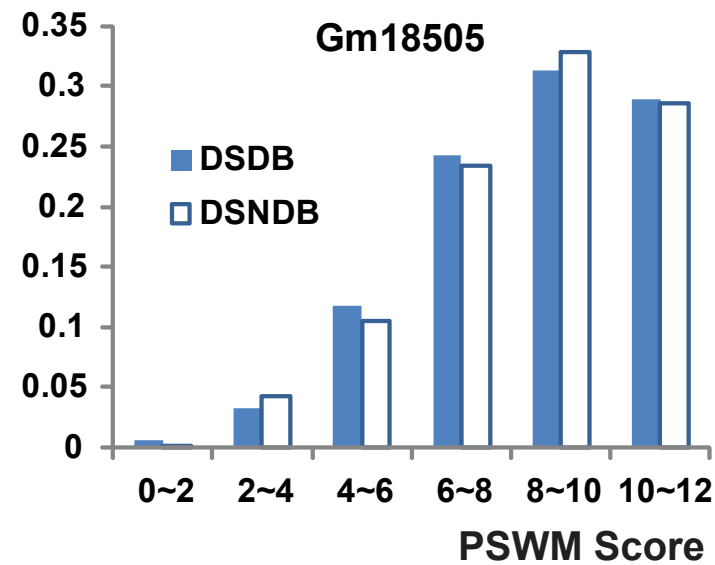

Supplement: pcbi.1003367.s010.pdf [file pcbi.1003367.s010.pdf]
